# Supplementary material for: A subgraph isomorphism algorithm and its application to biochemical data
Source: Springer Nature journal article supplement (doi:10.1186/1471-2105-14-s7-s13), 2013-04-01
Supplement: 12859_2013_5823_MOESM2_ESM.pdf [file 12859_2013_5823_MOESM2_ESM.pdf]

| Dataset                              | Measurement | RI                    | VF2             | LAD           | FocusSearch           |
|--------------------------------------|-------------|-----------------------|-----------------|---------------|-----------------------|
| <i>AIDS</i>                          | Matching    | <b>0.529</b> (±0.386) | 8.449(±6.447)   | 1.615(±1.989) | 2.404(±1.338)         |
|                                      | Total       | <b>3.448</b> (±0.391) | 16.678(±6.454)  | 4.697(±1.883) | 7.212(±1.105)         |
| <i>PDBSv1</i>                        | Matching    | <b>0.040</b> (±0.112) | 4.476(±11.136)  | 1.747(±5.104) | 0.224(±0.695)         |
|                                      | Total       | <b>0.049</b> (±0.120) | 6.438(±15.581)  | 1.812(±5.213) | 0.231(±0.612)         |
| <i>PDBSv2</i>                        | Matching    | <b>0.008</b> (±0.010) | 1.653(±2.402)   | 0.621(±0.953) | 0.130(±0.148)         |
|                                      | Total       | <b>0.014</b> (±0.013) | 2.252(±2.915)   | 0.640(±0.961) | 0.138(±0.142)         |
| <i>PDBSv3</i><br>Dense Patterns      | Matching    | <b>0.000</b> (±0.001) | 0.027(±0.055)   | 0.002(±0.001) | 0.002(±0.001)         |
|                                      | Total       | <b>0.005</b> (±0.002) | 0.049(±0.063)   | 0.004(±0.001) | 0.006(±0.002)         |
| <i>PDBSv3</i><br>Semi-dense Patterns | Matching    | 0.019(±0.052)         | 6.227(±8.810)   | 0.093(±0.371) | <b>0.006</b> (±0.013) |
|                                      | Total       | 0.023(±0.053)         | 6.248(±8.813)   | 0.095(±0.370) | <b>0.009</b> (±0.014) |
| <i>PDBSv3</i><br>Sparse Patterns     | Matching    | 1.136(±1.330)         | 23.221(±21.364) | 3.417(±4.803) | <b>0.231</b> (±0.344) |
|                                      | Total       | 1.142(±1.330)         | 23.255(±21.367) | 3.420(±4.802) | <b>0.236</b> (±0.343) |
