# Supplementary material for: A subgraph isomorphism algorithm and its application to biochemical data
Source: Springer Nature journal article supplement (doi:10.1186/1471-2105-14-s7-s13), 2013-04-01
Supplement: 12859_2013_5823_MOESM3_ESM.pdf [file 12859_2013_5823_MOESM3_ESM.pdf]

| Dataset             | Measurement | RI                            | VF2                         | LAD                               | FocusSearch                       |
|---------------------|-------------|-------------------------------|-----------------------------|-----------------------------------|-----------------------------------|
| <i>AIDS</i>         | Space       | 2513149.2( $\pm$ 2343680.6)   | 3180536.8( $\pm$ 2305950.4) | <b>273099.9</b> ( $\pm$ 413978.4) | 865652.4( $\pm$ 1097407.6)        |
|                     | Memory      | <b>85443.6</b> ( $\pm$ 291.0) | 393179.7( $\pm$ 188.5)      | 891944.0( $\pm$ 55160.7)          | 230816.3( $\pm$ 6371.3)           |
| <i>PDBSv1</i>       | Space       | 267551.5( $\pm$ 746512.4)     | 354017.7( $\pm$ 1006772.6)  | 76184.5( $\pm$ 252165.3)          | 93060.1( $\pm$ 291.0)             |
|                     | Memory      | <b>2117.4</b> ( $\pm$ 1133.0) | 2184.6( $\pm$ 1149.6)       | 60501.3( $\pm$ 139329.8)          | 17478.1( $\pm$ 44098.4)           |
| <i>PDBSv2</i>       | Space       | 48350.7( $\pm$ 67986.0)       | 90819.4( $\pm$ 131760.1)    | <b>9508.0</b> ( $\pm$ 17825.1)    | 20497.0( $\pm$ 39395.7)           |
|                     | Memory      | <b>1759.4</b> ( $\pm$ 301.0)  | 2016.4( $\pm$ 391.0)        | 21726.3( $\pm$ 16840.0)           | 5735.0( $\pm$ 2974.4)             |
| <i>PDBSv3</i>       | Space       | 216.9( $\pm$ 268.3)           | 1259.8( $\pm$ 2311.1)       | 5.6( $\pm$ 8.3)                   | <b>4.8</b> ( $\pm$ 20.9)          |
| Dense Patterns      | Memory      | 1421.3( $\pm$ 104.5)          | 1651.4( $\pm$ 164.5)        | <b>1134.8</b> ( $\pm$ 278.4)      | 1505.1( $\pm$ 98.4)               |
| <i>PDBSv3</i>       | Space       | 26157.7( $\pm$ 81705.1)       | 262101.9( $\pm$ 374101.4)   | 8594.0( $\pm$ 38699.1)            | <b>7032.5</b> ( $\pm$ 29940.4)    |
| Semi-dense Patterns | Memory      | 1396.8( $\pm$ 113.5)          | 1614.2( $\pm$ 178.5)        | <b>1207.6</b> ( $\pm$ 326.2)      | 1511.7( $\pm$ 124.5)              |
| <i>PDBSv3</i>       | Space       | 1263241.8( $\pm$ 1455655.3)   | 1456893.3( $\pm$ 1383478.8) | 635652.2( $\pm$ 920536.4)         | <b>568985.5</b> ( $\pm$ 889671.1) |
| Sparse Patterns     | Memory      | 1511.1( $\pm$ 121.5)          | 1798.6( $\pm$ 190.7)        | <b>1418.6</b> ( $\pm$ 298.8)      | 1626.2( $\pm$ 119.5)              |
