# Supplementary material for: A subgraph isomorphism algorithm and its application to biochemical data
Source: Springer Nature journal article supplement (doi:10.1186/1471-2105-14-s7-s13), 2013-04-01
Supplement: 12859_2013_5823_MOESM4_ESM.pdf [file 12859_2013_5823_MOESM4_ESM.pdf]

| Sansone<br>et al.<br>dataset |          | Measurement           | RI            | RI-Ds          | VF2             | LAD           | FocusSearch |
|------------------------------|----------|-----------------------|---------------|----------------|-----------------|---------------|-------------|
| <i>bounded</i>               | Matching | <b>0.002</b> (±0.014) | 0.010(±0.012) | 1.200(±6.578)  | 0.466(±3.745)   | 0.018(±0.012) |             |
|                              | Total    | <b>0.003</b> (±0.014) | 0.015(±0.015) | 1.210(±6.578)  | 0.467(±3.723)   | 0.022(±0.015) |             |
| <i>m2D</i>                   | Matching | <b>0.007</b> (±0.012) | 0.014(±0.009) | 6.650(±12.299) | 16.800(±21.899) | 0.120(±0.009) |             |
|                              | Total    | <b>0.007</b> (±0.012) | 0.024(±0.012) | 6.660(±12.299) | 16.842(±21.878) | 0.122(±0.012) |             |
| <i>m3D</i>                   | Matching | <b>0.003</b> (±0.008) | 0.016(±0.006) | 1.680(±6.631)  | 1.670(±4.986)   | 0.051(±0.006) |             |
|                              | Total    | <b>0.004</b> (±0.008) | 0.025(±0.010) | 1.690(±6.630)  | 1.675(±4.959)   | 0.054(±0.010) |             |
| <i>m4D</i>                   | Matching | <b>0.004</b> (±0.009) | 0.026(±0.029) | 5.840(±13.405) | 2.390(±13.581)  | 0.056(±0.029) |             |
|                              | Total    | <b>0.005</b> (±0.010) | 0.036(±0.032) | 5.860(±13.407) | 2.390(±13.466)  | 0.059(±0.032) |             |
| <i>random</i>                | Matching | <b>0.006</b> (±0.011) | 0.044(±0.011) | 9.730(±10.499) | 17.400(±13.440) | 0.904(±0.022) |             |
|                              | Total    | <b>0.008</b> (±0.012) | 0.060(±0.024) | 9.750(±10.499) | 17.363(±13.362) | 0.910(±0.024) |             |
