# Supplementary material for: A subgraph isomorphism algorithm and its application to biochemical data
Source: Springer Nature journal article supplement (doi:10.1186/1471-2105-14-s7-s13), 2013-04-01
Supplement: 12859_2013_5823_MOESM5_ESM.pdf [file 12859_2013_5823_MOESM5_ESM.pdf]

| Sansone et al. dataset | Measurement | RI                            | RI-Ds                     | VF2                        | LAD                          | FocusSearch                       |
|------------------------|-------------|-------------------------------|---------------------------|----------------------------|------------------------------|-----------------------------------|
| <i>bounded</i>         | Space       | 23075.3( $\pm 144186.4$ )     | 18875.4( $\pm 129865.1$ ) | 50251.0( $\pm 292235.6$ )  | 200579.3( $\pm 2003484.9$ )  | <b>17825.9</b> ( $\pm 140249.8$ ) |
|                        | Memory      | <b>1197.5</b> ( $\pm 23.5$ )  | 2170.6( $\pm 576.2$ )     | 1264.9( $\pm 24.5$ )       | 3419.2( $\pm 1187.1$ )       | 1986.2( $\pm 378.0$ )             |
| <i>m2D</i>             | Space       | 60981.4( $\pm 126743.4$ )     | 62225.1( $\pm 134576.4$ ) | 435275.2( $\pm 886849.8$ ) | 5138548.6( $\pm 9522834.3$ ) | <b>32429.8</b> ( $\pm 111715.1$ ) |
|                        | Memory      | <b>1165.1</b> ( $\pm 11.9$ )  | 3681.8( $\pm 1002.7$ )    | 1233.0( $\pm 16.8$ )       | 2536.5( $\pm 969.1$ )        | 2422.3( $\pm 441.0$ )             |
| <i>m3D</i>             | Space       | 17954.6( $\pm 66174.3$ )      | 18514.9( $\pm 59120.5$ )  | 96122.8( $\pm 348596.4$ )  | 369750.1( $\pm 2228839.7$ )  | <b>14153.5</b> ( $\pm 65491.0$ )  |
|                        | Memory      | <b>1203.0</b> ( $\pm 15.3$ )  | 3887.8( $\pm 1014.3$ )    | 1276.2( $\pm 21.3$ )       | 3803.2( $\pm 1456.9$ )       | 2712.7( $\pm 511.8$ )             |
| <i>m4D</i>             | Space       | 32346.0( $\pm 48158.6$ )      | 30922.6( $\pm 84468.8$ )  | 236478.5( $\pm 678002.9$ ) | 821218.5( $\pm 3265606.9$ )  | <b>27288.8</b> ( $\pm 42011.9$ )  |
|                        | Memory      | <b>1229.5</b> ( $\pm 146.2$ ) | 5252.6( $\pm 927.9$ )     | 1308.5( $\pm 133.1$ )      | 6503.2( $\pm 4262.6$ )       | 3586.2( $\pm 22427.2$ )           |
| <i>random</i>          | Space       | 19454.3( $\pm 84467.6$ )      | 20192.5( $\pm 84468.8$ )  | 492009.7( $\pm 777867.1$ ) | 883592.4( $\pm 2747329.3$ )  | <b>8090.0</b> ( $\pm 28369.8$ )   |
|                        | Memory      | <b>1404.1</b> ( $\pm 130.1$ ) | 5870.9( $\pm 686.6$ )     | 1457.2( $\pm 117.0$ )      | 7522.8( $\pm 2554.0$ )       | 24777.5( $\pm 15858.3$ )          |
