# Supplementary material for: A subgraph isomorphism algorithm and its application to biochemical data
Source: Springer Nature journal article supplement (doi:10.1186/1471-2105-14-s7-s13), 2013-04-01
Supplement: 12859_2013_5823_MOESM6_ESM.pdf [file 12859_2013_5823_MOESM6_ESM.pdf]

GRAEMLIN

| dataset              | Measurement | RI            | RI-Ds                | RI-DsPm       | VF2            | LAD           | FocusSearch   |
|----------------------|-------------|---------------|----------------------|---------------|----------------|---------------|---------------|
| <i>32 labels</i>     | Matching    | 0.108(±0.513) | <b>0.025(±0.094)</b> | 0.050(±0.101) | 2.879(±10.164) | 1.416(±7.373) | 0.034(±0.045) |
|                      | Total       | 0.149(±0.525) | <b>0.064(±0.113)</b> | 0.103(±0.132) | 3.604(±10.335) | 1.464(±7.384) | 0.092(±0.083) |
| <i>512 labels</i>    | Matching    | 0.077(±0.471) | <b>0.011(±0.030)</b> | 0.019(±0.031) | 1.520(±6.980)  | 0.038(±0.293) | 0.019(±0.022) |
|                      | Total       | 0.124(±0.490) | <b>0.057(±0.060)</b> | 0.080(±0.072) | 2.374(±7.432)  | 0.095(±0.321) | 0.088(±0.078) |
| <i>2048 labels</i>   | Matching    | 0.009(±0.104) | <b>0.008(±0.046)</b> | 0.014(±0.014) | 0.368(±3.643)  | 0.007(±0.060) | 0.017(±0.021) |
|                      | Total       | 0.058(±0.129) | <b>0.056(±0.077)</b> | 0.077(±0.058) | 1.243(±4.145)  | 0.066(±0.095) | 0.089(±0.074) |
| <i>unique labels</i> | Matching    | 0.000(±0.000) | <b>0.006(±0.001)</b> | 0.012(±0.003) | 0.004(±0.001)  | 0.004(±0.001) | 0.016(±0.003) |
|                      | Total       | 0.050(±0.024) | <b>0.055(±0.025)</b> | 0.075(±0.030) | 0.884(±0.489)  | 0.063(±0.030) | 0.090(±0.030) |
