# Supplementary material for: A subgraph isomorphism algorithm and its application to biochemical data
Source: Springer Nature journal article supplement (doi:10.1186/1471-2105-14-s7-s13), 2013-04-01
Supplement: 12859_2013_5823_MOESM7_ESM.pdf [file 12859_2013_5823_MOESM7_ESM.pdf]

## GRAEMLIN

| dataset              | Measurement | RI                             | RI-Ds                     | RI-DsPm                   | VF2                       | LAD                         | FocusSearch                     |
|----------------------|-------------|--------------------------------|---------------------------|---------------------------|---------------------------|-----------------------------|---------------------------------|
| <i>32 labels</i>     | Space       | 62786.7( $\pm 299865.9$ )      | 60369.9( $\pm 286824.6$ ) | 55436.3( $\pm 262247.0$ ) | 70545.6( $\pm 306445.6$ ) | 480395.1( $\pm 2330735.6$ ) | <b>5991.0</b> ( $\pm 22584.5$ ) |
|                      | Memory      | <b>3316.3</b> ( $\pm 1887.8$ ) | 3631.2( $\pm 2073.9$ )    | 16843.8( $\pm 8788.8$ )   | 5551.3( $\pm 3905.3$ )    | 14287.2( $\pm 11973.2$ )    | 5598.1( $\pm 3641.8$ )          |
| <i>512 labels</i>    | Space       | 8647.6( $\pm 46467.2$ )        | 3530.0( $\pm 20102.8$ )   | 1883.1( $\pm 13353.5$ )   | 12199.8( $\pm 59459.2$ )  | 1266.6( $\pm 21471.7$ )     | <b>566.8</b> ( $\pm 3221.7$ )   |
|                      | Memory      | <b>3706.5</b> ( $\pm 2161.6$ ) | 3875.0( $\pm 2238.9$ )    | 17124.6( $\pm 8953.9$ )   | 6359.9( $\pm 4478.9$ )    | 16496.5( $\pm 13993.9$ )    | 5491.9( $\pm 3587.2$ )          |
| <i>2048 labels</i>   | Space       | 945.7( $\pm 29748.6$ )         | 439.7( $\pm 55878.7$ )    | 146.6( $\pm 14344.5$ )    | 2213.9( $\pm 35293.2$ )   | 83.1( $\pm 9020.2$ )        | <b>43.1</b> ( $\pm 6892.2$ )    |
|                      | Memory      | <b>3780.4</b> ( $\pm 2153.6$ ) | 3932.6( $\pm 2210.9$ )    | 17247.3( $\pm 8648.6$ )   | 6513.6( $\pm 4465.0$ )    | 16652.8( $\pm 13672.7$ )    | 5537.5( $\pm 3393.5$ )          |
| <i>unique labels</i> | Space       | 42.6( $\pm 4.1$ )              | 40.9( $\pm 4.1$ )         | 40.9( $\pm 4.1$ )         | 41.9( $\pm 4.1$ )         | 2.0( $\pm 0.0$ )            | <b>0.0</b> ( $\pm 0.0$ )        |
|                      | Memory      | <b>3799.6</b> ( $\pm 1262.7$ ) | 3932.5( $\pm 1284.5$ )    | 17225.0( $\pm 4980.2$ )   | 6554.2( $\pm 2617.9$ )    | 16347.2( $\pm 7941.3$ )     | 5373.1( $\pm 1927.7$ )          |
