# Supplementary material for: A subgraph isomorphism algorithm and its application to biochemical data
Source: Springer Nature journal article supplement (doi:10.1186/1471-2105-14-s7-s13), 2013-04-01
Supplement: 12859_2013_5823_MOESM8_ESM.pdf [file 12859_2013_5823_MOESM8_ESM.pdf]

| PPI network dataset                     | Measurement | RI                    | RI-Ds                 | RI-Ds-Pm      | LAD                   | FocusSearch           |
|-----------------------------------------|-------------|-----------------------|-----------------------|---------------|-----------------------|-----------------------|
| <i>Unique labels</i>                    | Matching    | <b>0.001</b> (±0.000) | 0.018(±0.011)         | 0.024(±0.013) | 0.009(±0.004)         | 0.032(±0.014)         |
|                                         | Total       | <b>0.064</b> (±0.045) | 0.082(±0.047)         | 0.123(±0.055) | 0.141(±0.064)         | 0.144(±0.073)         |
| <i>Labels with skewed distribution</i>  |             |                       |                       |               |                       |                       |
| 32                                      | Matching    | 4.564(±9.099)         | <b>0.116</b> (±0.221) | 0.142(±0.186) | 15.120(±26.939)       | 0.150(±0.167)         |
|                                         | Total       | 4.609(±9.102)         | <b>0.197</b> (±0.220) | 0.224(±0.201) | 15.230(±26.936)       | 0.216(±0.163)         |
| 512                                     | Matching    | 1.719(±7.570)         | 0.170(±0.211)         | 0.148(±0.186) | 1.522(±7.089)         | <b>0.127</b> (±0.387) |
|                                         | Total       | 1.776(±7.585)         | 0.263(±0.220)         | 0.242(±0.201) | 1.647(±7.107)         | <b>0.210</b> (±0.404) |
| 2048                                    | Matching    | 0.441(±3.337)         | <b>0.022</b> (±0.077) | 0.026(±0.037) | 0.129(±0.910)         | 0.038(±0.030)         |
|                                         | Total       | 0.501(±3.368)         | <b>0.119</b> (±0.115) | 0.122(±0.077) | 0.257(±0.954)         | 0.127(±0.081)         |
| <i>Labels with uniform distribution</i> |             |                       |                       |               |                       |                       |
| 32                                      | Matching    | 0.268(±0.666)         | <b>0.056</b> (±0.118) | 0.089(±0.118) | 6.141(±20.413)        | 0.191(±0.459)         |
|                                         | Total       | 0.319(±0.676)         | <b>0.148</b> (±0.137) | 0.177(±0.141) | 6.259(±20.420)        | 0.265(±0.472)         |
| 256                                     | Matching    | 0.431(±1.894)         | <b>0.052</b> (±0.173) | 0.066(±0.178) | 1.342(±6.250)         | 0.065(±0.133)         |
|                                         | Total       | 0.490(±1.915)         | <b>0.149</b> (±0.201) | 0.162(±0.207) | 1.470(±6.278)         | 0.151(±0.165)         |
| 2048                                    | Matching    | 0.002(±0.007)         | 0.013(±0.007)         | 0.020(±0.011) | <b>0.010</b> (±0.007) | 0.035(±0.016)         |
|                                         | Total       | 0.064(±0.048)         | 0.114(±0.052)         | 0.118(±0.056) | <b>0.139</b> (±0.065) | 0.126(±0.075)         |
