# Supplementary material for: A subgraph isomorphism algorithm and its application to biochemical data
Source: Springer Nature journal article supplement (doi:10.1186/1471-2105-14-s7-s13), 2013-04-01
Supplement: 12859_2013_5823_MOESM9_ESM.pdf [file 12859_2013_5823_MOESM9_ESM.pdf]

| PPI network dataset                     | Measurement | RI                      | RI-Ds                   | RI-Ds-Pm             | LAD                   | FocusSearch                 |
|-----------------------------------------|-------------|-------------------------|-------------------------|----------------------|-----------------------|-----------------------------|
| <i>unique labels</i>                    | Space       | 32.2(±14.8)             | 225.6(±14.8)            | 225.6(±14.8)         | 2.0(±0.0)             | <b>0.0</b> (±0.0)           |
|                                         | Memory      | <b>4873.2</b> (±2273.0) | 5201.5(±2294.1)         | 37098.4(±9310.1)     | 69584.4(±36417.9)     | 16143.6(±7439.6)            |
| <i>Labels with skewed distribution</i>  |             |                         |                         |                      |                       |                             |
| 32                                      | Space       | 1211033.9(±2016492.2)   | 2500732.9(±617967.4)    | 2370084.3(±608787.5) | 1670880.3(±4121724.3) | <b>67329.1</b> (±122938.1)  |
|                                         | Memory      | <b>3997.0</b> (±1025.6) | <b>3997.0</b> (±8729.3) | 38651.3(±9058.4)     | 66502.3(±28711.4)     | 17174.0(±6504.2)            |
| 512                                     | Space       | 476352.8(±2049546.4)    | 1437629.6(±945342.0)    | 1275656.2(±808322.3) | 112381.1(±499665.1)   | <b>72136.7</b> (±327591.8)  |
|                                         | Memory      | <b>4530.2</b> (±1991.3) | <b>4530.2</b> (±9247.4) | 37547.0(±9548.6)     | 71092.2(±36261.5)     | 16965.5(±7787.0)            |
| 2048                                    | Space       | 28564.8(±215397.3)      | 36633.3(±39000.5)       | 25916.7(±27735.7)    | 2763.0(±20853.2)      | <b>1755.2</b> (±13274.3)    |
|                                         | Memory      | <b>4680.5</b> (±2190.6) | <b>4680.5</b> (±9245.3) | 37042.5(±9402.6)     | 70360.8(±36727.5)     | 16332.2(±7588.5)            |
| <i>Labels with uniform distribution</i> |             |                         |                         |                      |                       |                             |
| 32                                      | Space       | 143365.8(±377057.7)     | 918815.3(±364689.4)     | 862651.5(±349474.4)  | 825666.3(±3415048.9)  | <b>100874.8</b> (±333778.9) |
|                                         | Memory      | <b>4275.7</b> (±1585.5) | <b>4275.7</b> (±9041.9) | 38126.5(±9518.0)     | 69011.0(±33673.0)     | 17427.1(±7521.3)            |
| 256                                     | Space       | 110747.4(±518291.5)     | 332790.6(±215013.0)     | 332656.0(±229833.1)  | 27633.6(±119970.4)    | <b>17512.8</b> (±82031.3)   |
|                                         | Memory      | <b>4644.2</b> (±2106.2) | <b>4644.2</b> (±9500.9) | 37645.1(±9443.3)     | 72311.6(±37727.9)     | 17010.0(±7973.8)            |
| 2048                                    | Space       | 98.0(±251.3)            | 470.8(±184.6)           | 319.2(±84.2)         | 13.7(±64.6)           | <b>6.5</b> (±38.3)          |
|                                         | Memory      | <b>4748.9</b> (±2252.5) | <b>4748.9</b> (±9295.1) | 37123.7(±9412.7)     | 70498.3(±36882.4)     | 16342.7(±7659.7)            |
